# Supplementary material for: Antioxidant Activity, α-Glucosidase Inhibition and UHPLC–ESI–MS/MS Profile of Shmar (Arbutus pavarii Pamp)
Source: MDPI journal article supplement (doi:10.3390/plants10081659), 2021-08-11
Supplement: s1 [file s1]

Supplementary Materials:

## Antioxidant Activity, $\alpha$ -Glucosidase Inhibition and UHPLC–ESI–MS/MS Profile of Shmar (*Arbutus pavarii* Pamp)

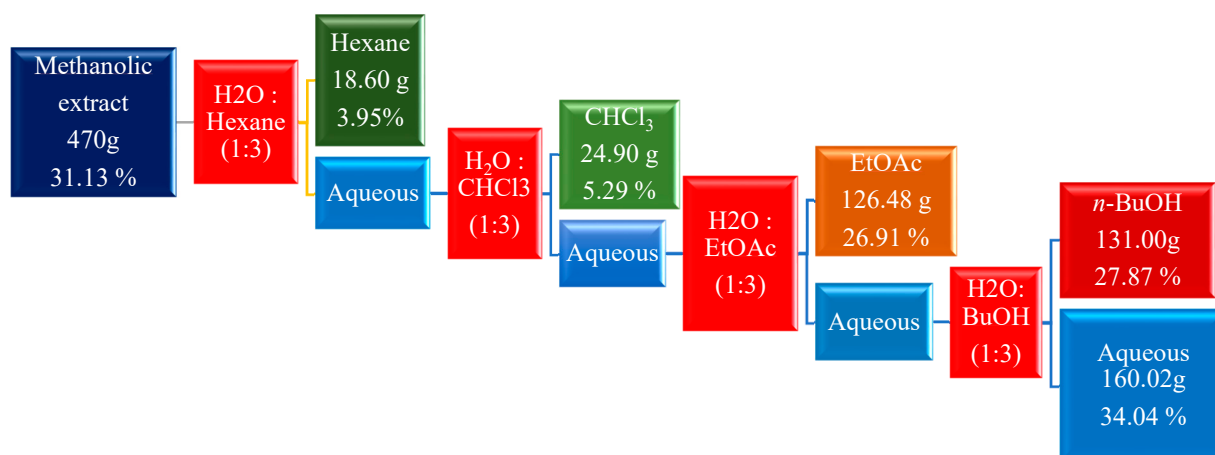

**Figure S1.** Fractionation of crude methanolic extract of *A.pavarii* leaf

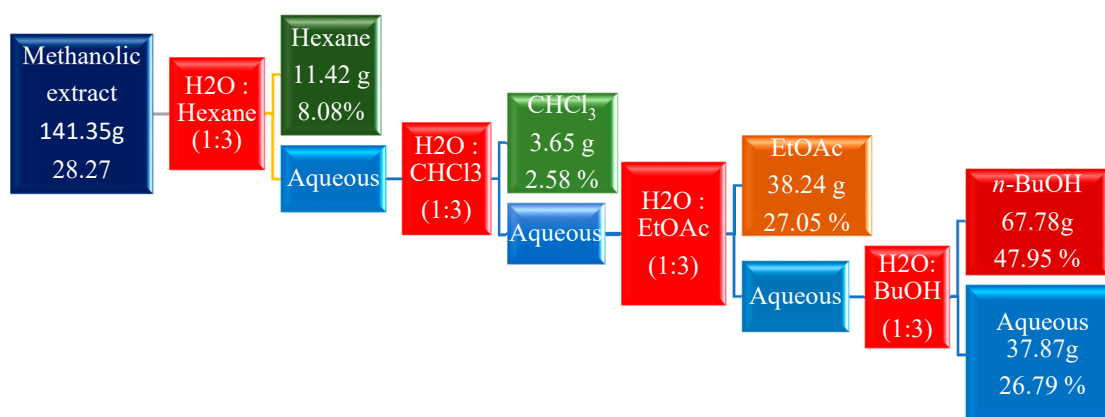

**Figure S2.** Fractionation of crude methanolic extract of *A.pavarii* stem bark.

**Table S1.** Yield of extracts and solvent fractions of *Arbutus pavarii*

| Plant part | Solvent            | Weight (g) | Yield % | Physical appearance  |
|------------|--------------------|------------|---------|----------------------|
| Leaf       | CH <sub>3</sub> OH | 470        | 31.13   | Dark-green brown gum |
|            | Hex                | 18.60      | 3.95    | Dark-green gum       |
|            | CHCl <sub>3</sub>  | 24.90      | 5.29    | Green gum            |
|            | EtOAc              | 126.48     | 26.91   | Dark-orang gum       |
|            | n-BuOH             | 131.00     | 27.87   | Brown gum            |
| Stem bark  | CH <sub>3</sub> OH | 141.35     | 28.27   | green-brown gum      |
|            | Hex                | 11.42      | 8.08    | Dark-green gum       |
|            | CHCl <sub>3</sub>  | 3.65       | 2.58    | Green gum            |
|            | EtOAc              | 38.24      | 27.05   | Dark-brown gum       |
|            | n-BuOH             | 67.78      | 47.95   | Dark-brown gum       |

CH<sub>3</sub>OH, methanol; Hex, hexane; CHCl<sub>3</sub>, chloroform; EtOAc, ethyl acetate; n-BuOH, butanol
